# Supplementary material for: Shp2 Inhibits Proliferation of Esophageal Squamous Cell Cancer via Dephosphorylation of Stat3
Source: PubMed Central journal article supplement (PMC5297767; doi:10.3390/ijms18010134), 2017-01-12
Supplement: ijms-18-00134-s001.pdf [file ijms-18-00134-s001.pdf]

# Supplementary Materials: Shp2 Inhibits Proliferation of Esophageal Squamous Cell Cancer via Dephosphorylation of Stat3

Chen Qi, Tao Han, Hua Tang, Kenan Huang, Jie Min, Jing Li, Xinyu Ding and Zhifei Xu

**Table S1.** Clinical-pathological characteristics and Shp2 expression.

| Variable                  | Shp2 Expression               |                              | p     |
|---------------------------|-------------------------------|------------------------------|-------|
|                           | Shp2-High Expression (n = 33) | Shp2-Low Expression (n = 34) |       |
| Median Age (range, years) | 60.94 (43–80)                 | 59.47 (41–81)                | 0.478 |
| Gender                    |                               |                              |       |
| Male                      | 25                            | 24                           | 0.633 |
| Female                    | 8                             | 10                           |       |
| Grade                     |                               |                              |       |
| G1                        | 7                             | 8                            | 0.004 |
| G2                        | 16                            | 22                           |       |
| G3                        | 10                            | 4                            |       |
| AJCC Stage                |                               |                              |       |
| I + II                    | 13                            | 20                           | 0.112 |
| III + IV                  | 20                            | 14                           |       |
| T classification          |                               |                              |       |
| T1 + T2                   | 6                             | 13                           | 0.069 |
| T3 + T4                   | 27                            | 21                           |       |
| N classification          |                               |                              |       |
| N0                        | 14                            | 18                           | 0.389 |
| N1                        | 19                            | 16                           |       |
| Tumor size                |                               |                              |       |
| ≥5.0 cm                   | 18                            | 18                           | 0.895 |
| <5.0 cm                   | 15                            | 16                           |       |

Shp2-high group (Shp2 expression in ESCC was higher than the median) and Shp2-Low group (Shp2 expression in ESCC was lower than the median) based on immunohistochemical analysis.

**Table S2.** shRNA sequences.

| Name       | Sequence (5' to 3') |
|------------|---------------------|
| Shp2-shRNA | GGGCCAGAGCAGTCAGTAA |

**Table S3.** Sequence of primers for real-time PCR.

| Primer                   | Sequence (5' to 3')        |
|--------------------------|----------------------------|
| GAPDH forward primer     | AGGTCGGTGTGAACGGATTTG      |
| GAPDH reverse primer     | TGTAGACCATGTAGTTGAGGTCA    |
| Shp2 forward primer      | CTGCCTCCACACCAGTGATA       |
| Shp2 reverse primer      | GGAGCCTGAGCAAGGAGC         |
| Cyclin D1 forward primer | AGCTCCTGTGCTGCGAAGTGAAAC   |
| Cyclin D1 reverse primer | AGTGTTC AATGAAATCGTGCGGGGT |
| Survivin forward primer  | GGCCCAGTGTTCCTTCTGCTT      |
| Survivin reverse primer  | GCAACCGGACGAATGCTTT        |
| Cyclin D2 forward primer | GGACATCCAACCCTACATGC       |
| Cyclin D2 reverse primer | CGCACTTCTGTTCCCTCACAG      |
| c-Jun forward primer     | GGCGATTCTCTCCAGCTTCC       |
| c-Jun reverse primer     | TCGACATGGAGTCCCAGGA        |
